# Supplementary material for: Soil Microbial Resource Limitations and Community Assembly Along a Camellia oleifera Plantation Chronosequence
Source: PubMed Central journal article supplement (PMC8675945; doi:10.3389/fmicb.2021.736165), 2021-12-02

**Soil microbial resource limitations and community assembly along an age gradient of a subtropical planted *Camellia oleifera* forest**

Hang Qiao, Longsheng Chen, Yajun Hu, Chenghua Deng, Qi Sun, Shaohong Deng, Xiangbi Chen, Li Mei, Jinshui Wu and Yirong Su

**Supplementary information**

Table S1. Enzymes included in this study.

| Enzyme                           | Abbreviations | EC <sup>a</sup> | Function                                                                                              |
|----------------------------------|---------------|-----------------|-------------------------------------------------------------------------------------------------------|
| $\beta$ -D-cellobiosidase        | CBH           | 3.2.1.91        | Cellulose degradation: hydrolyses cellobiose dimers from non-reducing ends of cellulose molecules     |
| $\beta$ -1, 4-glucosidase        | BG            | 3.2.1.21        | Cellulose degradation: hydrolyses glucose from cellobiose                                             |
| L-leucine aminopeptidase         | LAP           | 3.4.11.1        | Proteolysis: hydrolyses leucine and other hydrophobic amino acids from the N terminus of polypeptides |
| $\beta$ -N-acetylglucosaminidase | NAG           | 3.2.1.14        | Chitin and peptidoglycan degradation: hydrolyses glucosamine from chitobiose                          |
| Acid phosphatase                 | AP            | 3.1.3.2         | Hydrolyses phosphate from phosphosaccharides and phospholipids                                        |

Note: <sup>a</sup> Enzyme commission classification (Sinsabaugh et al., 2008, 2009).

Table S2. Significant differences of soil bacterial community between stand age.

|                           | <i>P</i> |
|---------------------------|----------|
| < 9 years vs 9-20 years   | 0.519    |
| < 9 years vs 21-60 years  | 0.005    |
| < 9 years vs > 60 years   | 0.001    |
| 9-20 years vs 21-60 years | 0.046    |
| 9-20 years vs > 60 years  | 0.008    |
| 21-60 years vs > 60 years | 0.852    |

Table S3. Mantel tests with Spearman's rank correlations between environmental factors (Euclidean distance) and  $\beta$ NTI of bacterial communities with 999 permutations. SOC: soil organic carbon, TN: total nitrogen, TP: total phosphorous, Olsen-P: Olsen phosphorous. ( $P < 0.05$ ).

| Variables | $\rho$ (Mantel test) | $P$   |
|-----------|----------------------|-------|
| pH        | 0.130                | 0.017 |
| SOC       | -0.021               | 0.573 |
| TN        | -0.080               | 0.785 |
| TP        | 0.142                | 0.117 |
| Olsen-P   | 0.084                | 0.247 |

Table S4. Topological properties of networks at different stand ages in *C. oleifera* plantation. Different letters denote significant difference among stand ages ( $P < 0.05$ ).

| Stand age     | Edges         | Nodes          | Transitivity (Trans) | Average Degree (AD) | Betweenness centrality (BC) | Average path Length (GD) | Density (DS) |
|---------------|---------------|----------------|----------------------|---------------------|-----------------------------|--------------------------|--------------|
| < 9 years     | 245.13±63.77a | 131.00±28.37a  | 0.37±0.04b           | 3.72±0.25b          | 0.19±0.06a                  | 4.37±0.33a               | 0.03±0.01b   |
| 9 – 20 years  | 263.20±42.34a | 143.70±19.80ab | 0.35±0.05ab          | 3.67±0.31b          | 0.18±0.05a                  | 4.54±0.28ab              | 0.03±0.01ab  |
| 21 – 60 years | 269.80±45.71a | 156.80±18.62b  | 0.35±0.03ab          | 3.43±0.28ab         | 0.17±0.05a                  | 4.79±0.17b               | 0.02±0.00a   |
| > 60 years    | 251.29±28.78a | 152.57±9.64ab  | 0.32±0.02a           | 3.29±0.24a          | 0.19±0.049a                 | 4.82±0.36b               | 0.02±0.00a   |

Different lowercase letters in the same column indicated the significance between different stand age ( $P < 0.05$ ).

Table S5. Variations of soil physicochemical properties at different stand ages in *C. oleifera* plantation.

Different letters denote significant difference among stand ages.

| Stand age     | pH         | SOC(g/Kg)   | TN(g/Kg)    | TP(g/Kg)   | Olsen-P(mg/Kg) |
|---------------|------------|-------------|-------------|------------|----------------|
| < 9 years     | 4.39±0.20a | 10.52±3.97a | 1.14±0.29a  | 0.35±0.21a | 6.54±5.78a     |
| 9 – 20 years  | 4.40±0.15a | 17.68±5.83b | 1.50±0.37ab | 0.40±0.19a | 5.70±3.42a     |
| 21 – 60 years | 4.32±0.20a | 20.71±2.67b | 1.75±0.28b  | 0.30±0.10a | 4.21±0.95a     |
| > 60 years    | 4.24±0.16a | 23.11±5.77b | 1.85±0.50b  | 0.34±0.14a | 5.10±1.39a     |

SOC, soil organic carbon; TN, total nitrogen; TP, total phosphorus; Olsen-P, Olsen phosphorus.

Different lowercase letters in the same column indicated the significance between different stand age ( $P < 0.05$ ).

Fig. S1.  $P$  value for the KS, SSE, and NNSD tests of the exponential distribution generated by random matrix theory.

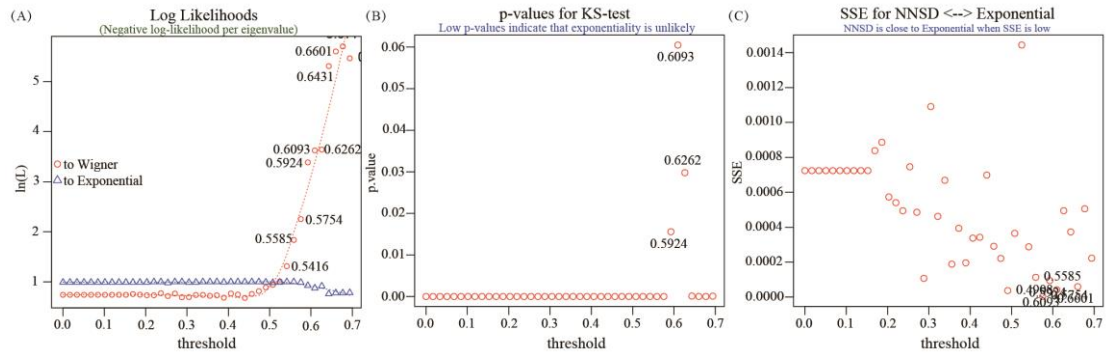

Figure S2. Variations of soil enzyme activities at different stand ages in *C. oleifera* plantation. Note: (A) CBH; (B) BG; (C) LAP; (D) NAG; (E) AP. Different letters denote significant difference among stand ages ( $P < 0.05$ ).

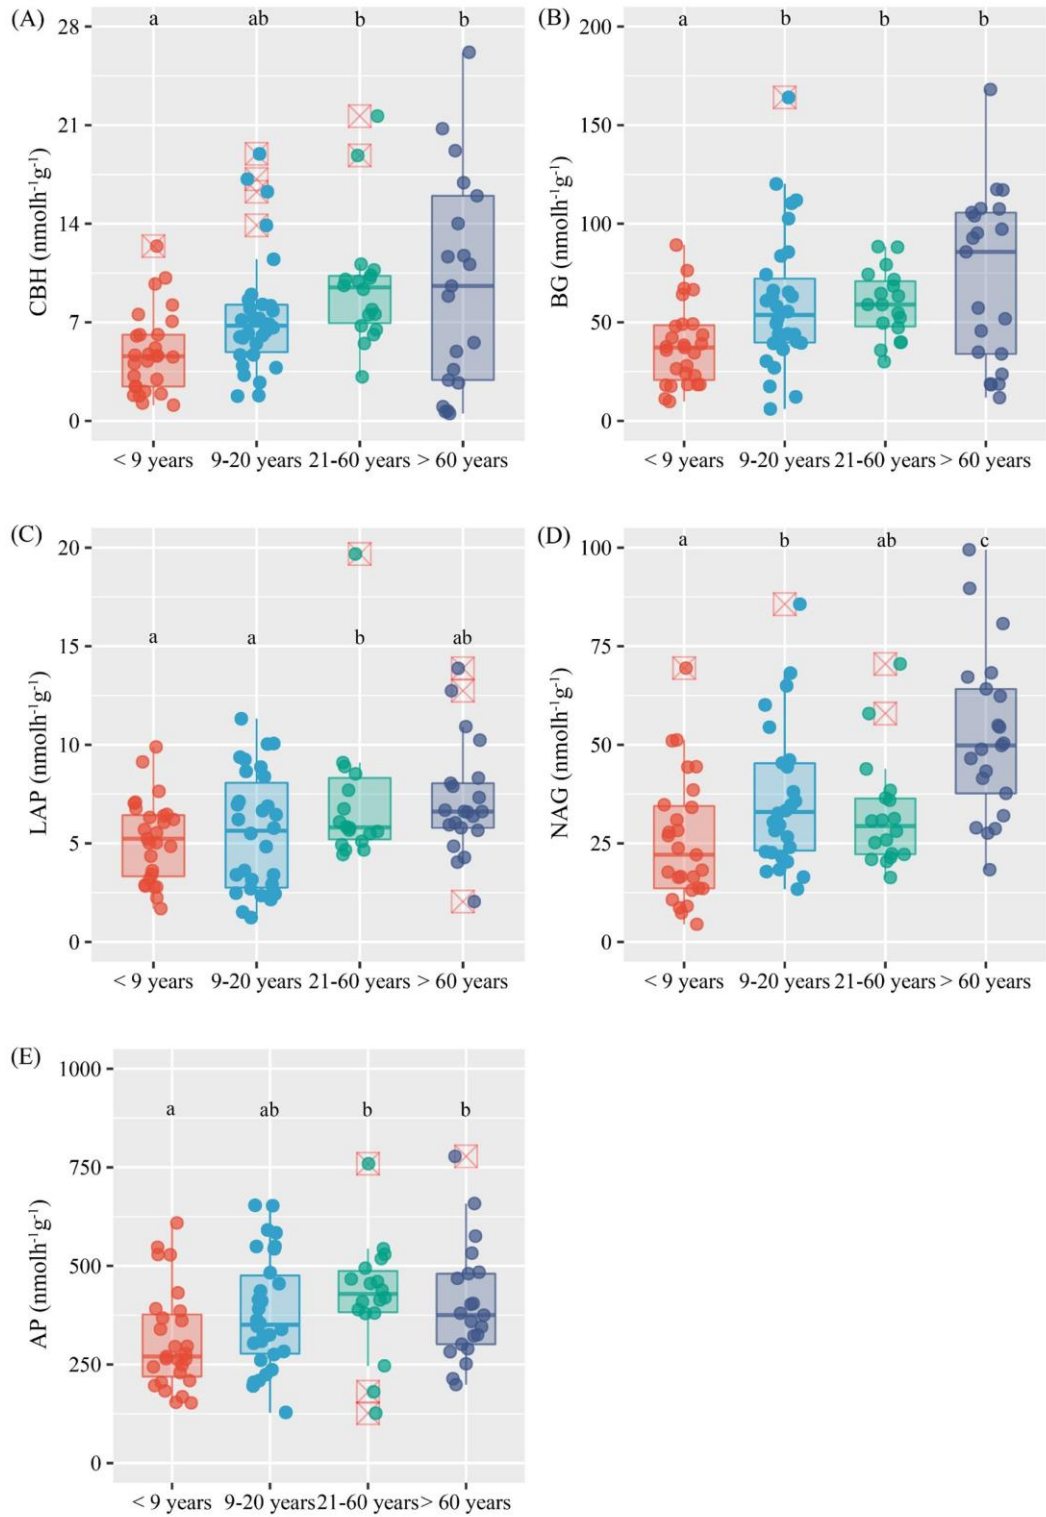



Fig. S3. Variations of soil enzymatic stoichiometry at different stand ages in *C. oleyfera* plantation Note: (A),  $(CBH+BG)/(NAG+LAP)$ ; (B),  $(CBH+ BG)/AP$ ; (C),  $(NAG + LAP)/AP$ . Different letters denote significant difference among stand ages ( $P < 0.05$ ).

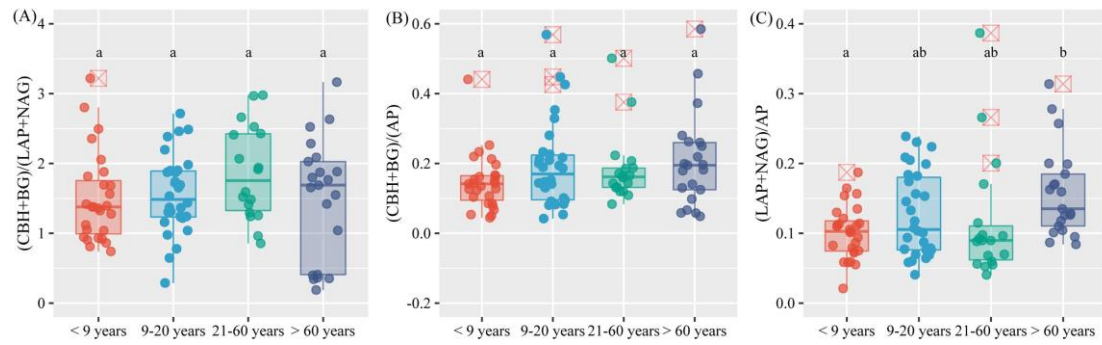

Fig. S4. Relationships between (A-C) vector A and soil organic carbon, total nitrogen or total phosphorus, and between (D-F) vector L and soil organic carbon, total nitrogen or total phosphorus. All  $P$  values of the regression analysis were  $< 0.05$ . SOC: soil organic carbon, TN: total nitrogen, TP: total phosphorus.

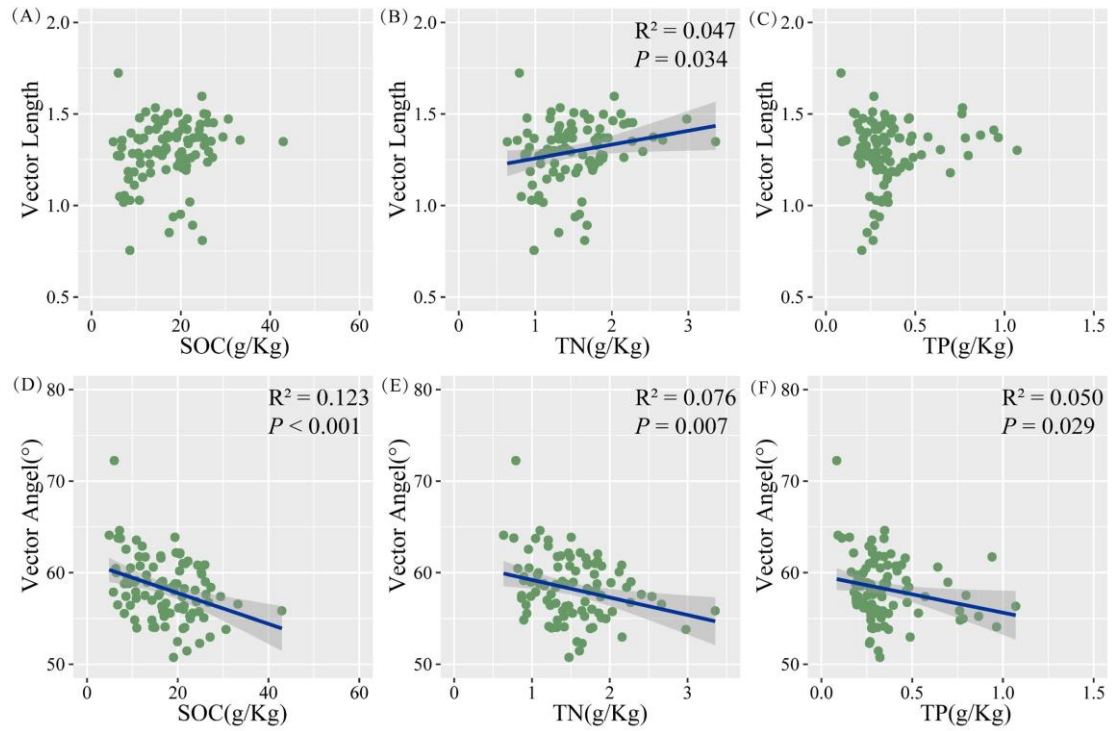

Fig. S5. Variations of soil bacterial alpha diversity at different stand ages in *C. oleifera* plantation Note: (A), richness; (B), Shannon diversity.

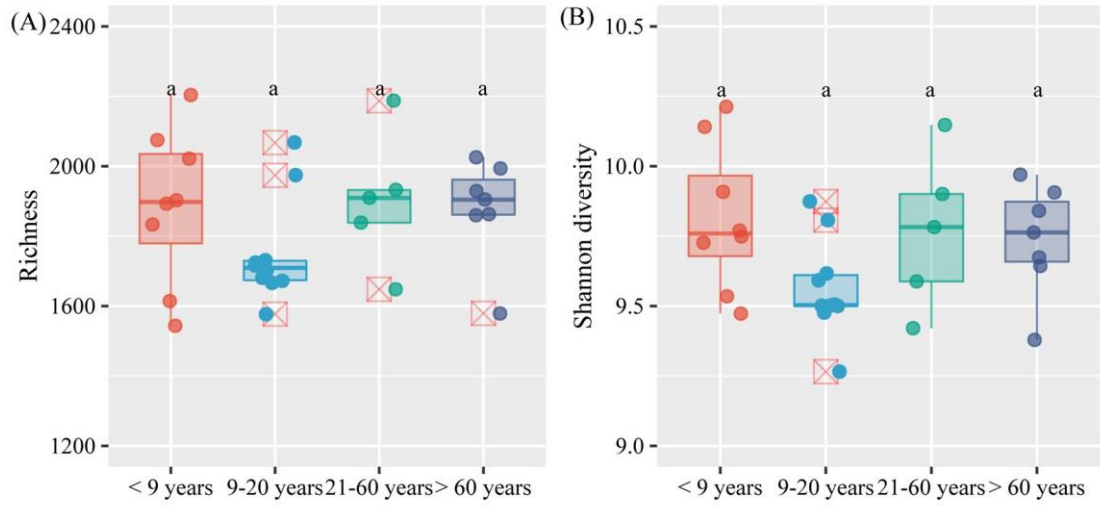

Fig. S6. Phylogenetic tree, taxonomic composition, and distribution patterns of *C. oleifera* dominant taxa.

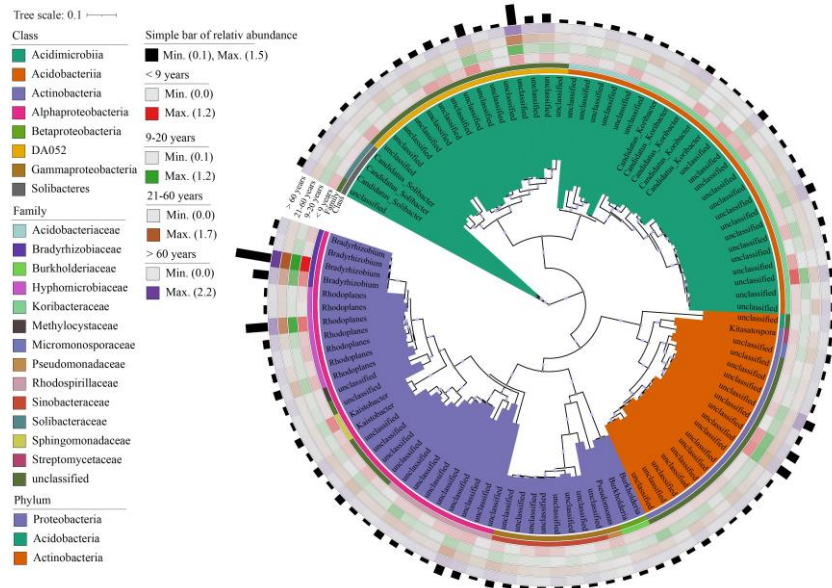

Fig. S7. Boxplot of the abundance of the 30 most abundant OTUs.

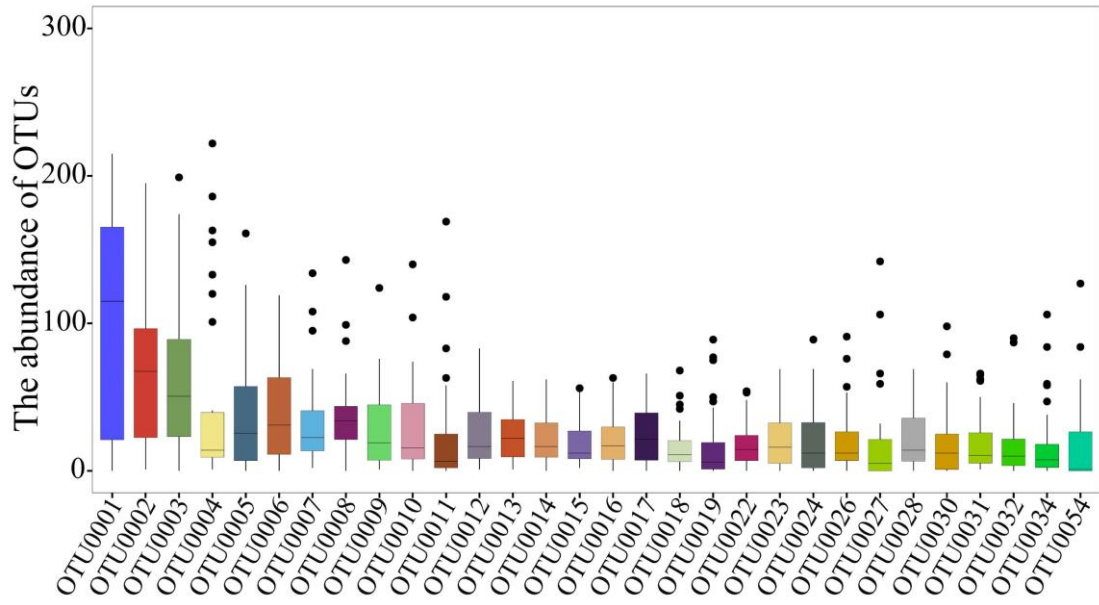

Supplement: Presentation_1.pdf [file Presentation_1.pdf]
